# Supplementary material for: Green Synthesis of Phosphorous-Containing Hydroxyapatite Nanoparticles (nHAP) as a Novel Nano-Fertilizer: Preliminary Assessment on Pomegranate (Punica granatum L.)
Source: MDPI journal article supplement (doi:10.3390/nano12091527), 2022-05-01
Supplement: s1 [file s1]

# Green Synthesis of Phosphorous-Containing Hydroxyapatite Nanoparticles (nHAP) as a Novel Nano-Fertilizer: Preliminary Assessment on Pomegranate (*Punica granatum* L.)

Hala M. Abdelmigid <sup>1,\*</sup>, Maissa M. Morsi <sup>2</sup>, Nahed Ahmed Hussien <sup>2,\*</sup>, Amal Ahmed Alyamani <sup>1</sup>, Nawal Abdallah Alhuthal <sup>3</sup> and Salim Albukhaty <sup>4,\*</sup>

<sup>1</sup> Department of Biotechnology, College of Science, Taif University, P.O. Box 11099, Taif 21944, Saudi Arabia; a.yamani@tu.edu.sa

<sup>2</sup> Department of Biology, College of Science, Taif University, P.O. Box 11099, Taif 21944, Saudi Arabia; m.moasa@tu.edu.sa

<sup>3</sup> Department of Chemistry, College of Science, Taif University, P.O. Box 11099, Taif 21944, Saudi Arabia; nawal.h@tu.edu.sa

<sup>4</sup> Department of Chemistry, College of Science, University of Misan, Maysan 62001, Iraq

\* Correspondence: h.majed@tu.edu.sa (H.M.A.); n.nahed@tu.edu.sa (N.A.H.); albukhaty.salim@uomisan.edu.iq (S.A.)

**Table S1.** GC/ MS results of the ethanolic extract of *Punica granatum* leaves under study: RT (retention time); MW (molecular weight); MF (molecular formula).

| Treatment | RT    | MW  | MF                                                 | AREA% | Probabilities of the Detected Compounds                      |
|-----------|-------|-----|----------------------------------------------------|-------|--------------------------------------------------------------|
| Control   | 5.18  | 355 | C <sub>22</sub> H <sub>13</sub> NO <sub>4</sub>    | 5.43  | 4-Hydroxy-3-(2-oxo-2H-1-oxa-3-phenanthryl)-2(1H)-quinolinone |
|           | 11.90 | 436 | C <sub>31</sub> H <sub>64</sub>                    | 1.03  | Hentriacontane (CAS)                                         |
|           | 18.24 | 254 | C <sub>18</sub> H <sub>38</sub>                    | 1.11  | Octadecane (CAS)                                             |
|           | 21.17 | 126 | C <sub>8</sub> H <sub>14</sub> O                   | 1.21  | 1-Octen-3-one (CAS)                                          |
|           | 24.24 | 828 | C <sub>42</sub> H <sub>70</sub> O <sub>5</sub> Yb  | 57.44 | bis(2,6-di-t-butyl-4 methylphenoxo)ytterbium(II)             |
|           | 24.39 | 206 | C <sub>16</sub> H <sub>14</sub>                    | 2.16  | trans, trans-1,4-Diphenyl-1,3-butadiene                      |
|           | 25.94 | 224 | Cl <sub>6</sub> H <sub>32</sub>                    | 1.54  | 7-Hexadecene, (Z)-                                           |
|           | 27.77 | 218 | C <sub>15</sub> H <sub>22</sub> O                  | 1.95  | aR-Turmerone                                                 |
|           | 28.28 | 254 | C <sub>18</sub> H <sub>38</sub>                    | 1.75  | Hexadecane, 7,9-dimethyl (CAS)                               |
|           | 30.23 | 414 | C <sub>20</sub> H <sub>41</sub> Cl <sub>3</sub> Si | 1.24  | Silane, trichloroicosyl-                                     |
|           | 30.36 | 212 | C <sub>15</sub> H <sub>32</sub>                    | 1.20  | Pentadecane (CAS)                                            |
|           | 32.34 | 212 | C <sub>15</sub> H <sub>32</sub>                    | 3.00  | Dodecane, 2,6,11-trimethyl-                                  |
|           | 32.95 | 298 | C <sub>19</sub> H <sub>38</sub> O <sub>2</sub>     | 1.67  | Octadecanoic acid, methyl ester (CAS)                        |
|           | 34.23 | 172 | C <sub>11</sub> H <sub>24</sub> O                  | 2.05  | Ether, hexyl pentyl (CAS)                                    |
|           | 36.07 | 294 | C <sub>19</sub> H <sub>34</sub> O <sub>2</sub>     | 4.94  | 9,12-Octadecadienoic acid (Z, Z)-, methyl ester              |
|           | 36.17 | 296 | C <sub>19</sub> H <sub>36</sub> O <sub>2</sub>     | 3.19  | 9-Octadecenoic acid, methyl ester, (E)-                      |
|           | 37.78 | 635 | C <sub>18</sub> H <sub>10</sub> Br <sub>5</sub> N  | 1.48  | Tris(2,4-dibromophenyl) amine                                |
|           | 39.11 | 404 | C <sub>20</sub> H <sub>36</sub> O <sub>8</sub>     | 2.22  | Tributyl 2-acetylcitrate                                     |
|           | 39.45 | 310 | C <sub>22</sub> H <sub>46</sub>                    | 1.31  | Docosane (CAS)                                               |
|           | 41.16 | 370 | C <sub>22</sub> H <sub>42</sub> O <sub>4</sub>     | 4.10  | Hexanedioic acid, bis(2-ethylhexyl) ester (CAS)              |

**Table S1.** Continued.

| Treatment | RT   | MW  | MF                                              | AREA% | Probabilities of the Detected Compounds                                                     |
|-----------|------|-----|-------------------------------------------------|-------|---------------------------------------------------------------------------------------------|
| NPK       | 5.19 | 72  | C <sub>4</sub> H <sub>6</sub> D <sub>2</sub> O  | 12.97 | Methyl 1-Dideuterio-2-propenyl ether                                                        |
|           | 5.27 | 646 | C <sub>36</sub> H <sub>54</sub> O <sub>10</sub> | 9.32  | Tetra-tert-butyl 2,6-di(3-propenyl)-3,7-dim ethoxybicyclo [3.3.0] octa-3,7-diene-2,4,6,8-di |

| carboxylate |     |                                                                 |       |                                                                                                                                           |
|-------------|-----|-----------------------------------------------------------------|-------|-------------------------------------------------------------------------------------------------------------------------------------------|
| 5.39        | 638 | C <sub>36</sub> H <sub>66</sub> Si <sub>5</sub>                 | 6.52  | 1,2-Bis(t-tributylsilyl)-1,2-diphenylcyclotrisilane                                                                                       |
| 5.70        | 640 | C <sub>36</sub> H <sub>37</sub> BrO <sub>4</sub> Si             | 1.82  | 15-Bromo-4,4'-bis(t-butyl)-11,12-diethylnaphtho[12-f]phenanthrol[2,1-d]-(1,3,2)-dioxasilepine-10,13-dione                                 |
| 6.07        | 648 | C <sub>44</sub> H <sub>32</sub> N <sub>4</sub> O <sub>2</sub>   | 1.36  | meso-Tetraphenyl-2,3-cis- dihydroxy-2,3-chlorin                                                                                           |
| 10.14       | 578 | C <sub>20</sub> H <sub>22</sub> Br <sub>4</sub>                 | 1.26  | 2,2',5,5'-Tetrabromo-4,4'- di-tert-butyl bi phenyl                                                                                        |
| 24.23       | 220 | C <sub>15</sub> H <sub>12</sub> N <sub>2</sub>                  | 36.33 | 2,3-dicyano-7,7-di methyl-5,6-benzonorbornadiene                                                                                          |
| 31.18       | 278 | C <sub>20</sub> H <sub>38</sub>                                 | 2.64  | 3-Eicosyne                                                                                                                                |
| 32.36       | 671 | C <sub>32</sub> H <sub>57</sub> NO <sub>6</sub> Sn              | 2.34  | tert-Butyl 3-Tributylstannyl-4- (methoxy ethoxy) -N-(tert-butoxy carbonyl) tyrosine                                                       |
| 32.96       | 270 | C <sub>17</sub> H <sub>34</sub> O <sub>2</sub>                  | 2.70  | Hexadecanoic acid, methyl ester (CAS)                                                                                                     |
| 36.08       | 288 | C <sub>15</sub> H <sub>28</sub> O <sub>3</sub> S                | 5.45  | Undec-10-enyl But-3-enesulfonate                                                                                                          |
| 36.18       | 296 | C <sub>19</sub> H <sub>36</sub> O <sub>2</sub>                  | 3.97  | 9-Octadecenoic acid methyl ester (CAS)                                                                                                    |
| 41.17       | 370 | C <sub>22</sub> H <sub>42</sub> O <sub>4</sub>                  | 1.66  | Hexanedioic acid, bis(2-Ethylhexyl) ester (CAS)                                                                                           |
| 42.59       | 394 | C <sub>28</sub> H <sub>58</sub>                                 | 1.51  | Octacosane (CAS)                                                                                                                          |
| 43.51       | 592 | C <sub>36</sub> H <sub>32</sub> O <sub>8</sub>                  | 1.57  | 1,5-bis[(6-methoxyphenyl) methyl-1,3-benzodioxol-3,9-Dioxo-2,4,8,10-tetrao xa-3,9-dithiaspiro [5.5] undecane                              |
| 45.54       | 228 | C <sub>5</sub> H <sub>8</sub> O <sub>6</sub> S <sub>2</sub>     | 2.51  | {4-[2'-(2''-(4'''-<Methoxycarbonyl>-2''',3'''-dichloro phenyl)-3''-ethyl-5''-pyrrolyl] methyl] butyryl]-2,3-di chlorophenoxy]-acetic acid |
| 46.60       | 615 | C <sub>27</sub> H <sub>25</sub> C <sub>14</sub> NO <sub>7</sub> | 1.55  | 3-Pentanol, 2,4-dimethyl-                                                                                                                 |
| 46.77       | 116 | C <sub>7</sub> H <sub>16</sub> O                                | 1.37  | 2,4,6,8-Tetramethyl-1-undecene                                                                                                            |
| 46.90       | 210 | C <sub>15</sub> H <sub>30</sub>                                 | 1.77  | Diethyl 5-[(isopropoxy)carbonyl]-5-methyl-2-phenylte tra hydro-1 <i>H</i> -pyrrol-3yl} phosphonate                                        |
| 54.13       | 383 | C <sub>19</sub> H <sub>30</sub> NO <sub>5</sub> P               | 1.37  |                                                                                                                                           |

| Treatment   | RT    | MW  | MF                                                              | AREA% | Probabilities of the Detected Compounds                                                                  |
|-------------|-------|-----|-----------------------------------------------------------------|-------|----------------------------------------------------------------------------------------------------------|
| nHAP_PPE 50 | 5.14  | 620 | C <sub>23</sub> H <sub>28</sub> Br <sub>4</sub>                 | 7.22  | 1,7-Bis (3,5-bis (bromomethyl)phenyl) heptane                                                            |
|             | 5.20  | 40  | Ar                                                              | 6.76  | Argon (CAS)                                                                                              |
|             | 5.33  | 116 | C <sub>5</sub> H <sub>8</sub> O <sub>3</sub>                    | 8.25  | 4,5-Dimethyl-1,3-dioxolan-2-one                                                                          |
|             | 5.40  | 651 | C <sub>39</sub> H <sub>49</sub> N <sub>5</sub> O <sub>4</sub>   | 4.08  | ẽ-meso-di methylamino methyl-porphyrin                                                                   |
|             | 5.48  | 40  | C <sub>3</sub> H <sub>4</sub>                                   | 4.97  | 1,2-Propadiene (CAS)                                                                                     |
|             | 5.56  | 660 | C <sub>36</sub> H <sub>44</sub> FN <sub>4</sub> NbO             | 1.95  | Fluoro(2,3,7,8,12,13,17,1 8-octaethylporphyrinato)oxoniobium                                             |
|             | 5.82  | 543 | C <sub>31</sub> H <sub>30</sub> ClN <sub>3</sub> O <sub>4</sub> | 1.66  | C-CAM-3-cyanomethyl Ether                                                                                |
|             | 7.25  | 660 | C <sub>29</sub> H <sub>26</sub> Br <sub>2</sub> O <sub>8</sub>  | 1.53  | 3',5'-Dimethoxyphenyl 1,8-Dibomo-4,5-diisoprop oxyanthraquinone-2-carboxylate                            |
|             | 8.00  | 84  | CH <sub>2</sub> Cl <sub>2</sub>                                 | 2.09  | Methane, dichloro- (CAS)                                                                                 |
|             | 10.98 | 630 | C <sub>42</sub> H <sub>31</sub> ClN <sub>2</sub> O <sub>2</sub> | 2.05  | 1-methyl-2,2-diphenyl-3-oxo-6-chloro-5-(5')- (1'-methyl-2',2'-diphenyl-3'-oxol1'-benzazoly) -1-benzazole |
|             | 24.24 | 220 | C <sub>15</sub> H <sub>24</sub> O                               | 37.29 | Butylated Hydroxytoluene                                                                                 |
|             | 31.18 | 278 | C <sub>20</sub> H <sub>38</sub>                                 | 6.18  | Neophytadiene                                                                                            |
|             | 32.35 | 212 | C <sub>15</sub> H <sub>32</sub>                                 | 1.55  | Pentadecane (CAS)                                                                                        |
|             | 36.08 | 294 | C <sub>19</sub> H <sub>34</sub> O <sub>2</sub>                  | 1.61  | 9,12-Octadecadienoic acid, methyl ester, (E,E)- (CAS)                                                    |
|             | 36.18 | 296 | C <sub>19</sub> H <sub>36</sub> O <sub>2</sub>                  | 1.83  | 9-Octadecenoic acid (Z)-, methyl ester (CAS)                                                             |
|             | 41.16 | 196 | C <sub>13</sub> H <sub>24</sub> O                               | 2.08  | Cyclobutanone, 2-(2,6-dimethylheptyl)-                                                                   |
|             | 42.59 | 603 | C <sub>38</sub> H <sub>32</sub> ClF <sub>2</sub> N <sub>3</sub> | 2.75  | 4-(4-Chlorophenyl)-2-(2- phenylethyl)-6-[4- [bis                                                         |

|       |     |                                                                 |      |                                                                                                                                                                                   |
|-------|-----|-----------------------------------------------------------------|------|-----------------------------------------------------------------------------------------------------------------------------------------------------------------------------------|
|       |     |                                                                 |      | (4-fluorophenyl) methyl] piperazinyl-1-yl]benzonitrile                                                                                                                            |
| 51.83 | 731 | C <sub>39</sub> H <sub>57</sub> NO <sub>3</sub> Ti <sub>3</sub> | 1.86 | [Tri {Titanium-penta methyl cyclopentadienyl(ac-oxa)}(ac-methyl){N-(2,6-dimethyl phenyl)}]                                                                                        |
| 51.92 | 597 | C <sub>32</sub> H <sub>39</sub> NO <sub>10</sub>                | 2.72 | 3-Pyridinecarboxylic acid 2,7,10-tris(acetyloxy)-1,1a,2,3,4,6,7,10,11,11a-decahydro-1,1,3,6,9-pentamethyl-4-oxo-4a,7a-epoxy-5H-cyclopenta[a]cyclopropa[f]cycloundecen-11-yl ester |
| 52.61 | 584 | C <sub>34</sub> H <sub>68</sub> O <sub>5</sub> Si               | 1.55 | Glycerine-1,3-dimyristate, 2-O-trimethylsilyl-                                                                                                                                    |

**Table S1.** Continued.

| Treatment    | RT    | MW  | MF                                                                              | AREA % | Probabilities of the Detected Compounds                                                                                                                  |
|--------------|-------|-----|---------------------------------------------------------------------------------|--------|----------------------------------------------------------------------------------------------------------------------------------------------------------|
| nHAP_PPE1000 | 5.26  | 170 | C <sub>5</sub> H <sub>8</sub> Cl <sub>2</sub> O <sub>2</sub>                    | 28.66  | 3,3-Dichloro-5-hydroxy-2-methyltetrahydrofuran                                                                                                           |
|              | 5.86  | 646 | C <sub>39</sub> H <sub>48</sub> N <sub>4</sub> NiO                              | 1.46   | Nickel(II) $\eta$ -meso-(2-Formylvinyl)octaethylchlorin                                                                                                  |
|              | 11.36 | 632 | C <sub>25</sub> H <sub>16</sub> Br <sub>4</sub>                                 | 1.76   | 4,4',4'',4'''-Tetra bromo tetra phenylmethane                                                                                                            |
|              | 21.72 | 601 | C <sub>31</sub> H <sub>21</sub> ClFN <sub>3</sub> O <sub>3</sub> S <sub>2</sub> | 1.14   | 7-{4'-[4''-(5'''-Chloro-2'''-methoxybenzoyl)amino]phenyl}-2-(thienylmethylenenyl)-2-(thienylmethylenel)-2,3-dihydro-5H-thiazolo[3,2-a]pyrimidine         |
|              | 24.23 | 828 | C <sub>42</sub> H <sub>70</sub> O <sub>5</sub> Yb                               | 45.15  | bis(2,6-di- <i>t</i> -butyl-4-methylphenolato)tris(tetrahydrofuran)ytterbium(II)                                                                         |
|              | 31.18 | 196 | C <sub>12</sub> H <sub>20</sub> O <sub>2</sub>                                  | 1.67   | (1 <i>RS</i> ,5 <i>SR</i> ,6 <i>SR</i> )-6-Pentyl-2-oxabicyclo[3.3.0]octan-3-one                                                                         |
|              | 32.35 | 184 | C <sub>13</sub> H <sub>28</sub>                                                 | 1.18   | Decane, 2,6,8-trimethyl- (CAS)                                                                                                                           |
|              | 36.08 | 138 | C <sub>10</sub> H <sub>18</sub>                                                 | 1.52   | cis-Pinane                                                                                                                                               |
|              | 40.40 | 478 | C <sub>52</sub> H <sub>60</sub> O <sub>4</sub>                                  | 1.21   | 26,28-Dihydroxy-25,27-dioxaocta-4-ene-2,6-diynyl- <i>p</i> -tert-butylcalix[4]arene                                                                      |
|              | 41.16 | 370 | C <sub>22</sub> H <sub>42</sub> O <sub>4</sub>                                  | 2.18   | Hexanedioic acid, dioctylester (CAS)                                                                                                                     |
|              | 42.60 | 635 | C <sub>18</sub> H <sub>10</sub> Br <sub>5</sub> N                               | 1.33   | (4-Bromophenyl)bis(2,4-dibromophenyl)amine                                                                                                               |
|              | 48.02 | 628 | C <sub>28</sub> H <sub>38</sub> Br <sub>2</sub> S <sub>3</sub>                  | 2.46   | 5,5''-Dibromo-3,3'',4,4''-tetra-butyl-2,2':5',2''-terthiophene                                                                                           |
|              | 48.62 | 615 | C <sub>27</sub> H <sub>25</sub> Cl <sub>4</sub> NO <sub>7</sub>                 | 1.22   | {4-[2'-[2''-(4'''-<Methoxycarbonyl>-2'''',3'''-dichlorophenyl)-3''-ethyl-5''-pyrrolyl]methyl]butyryl]-2,3-dichlorophenoxy]-acetic acid                   |
|              | 49.90 | 648 | C <sub>35</sub> H <sub>38</sub> Cl <sub>2</sub> N <sub>4</sub> O <sub>4</sub>   | 1.36   | 2,4-bis(4-chloroethyl)-6,7-bis[4-methoxycarbonyl]ethyl]-1,3,5-trimethylporphyrin                                                                         |
|              | 50.24 | 599 | C <sub>36</sub> H <sub>44</sub> N <sub>4</sub> OV                               | 1.19   | Vanadyl octaethylporphyrin                                                                                                                               |
|              | 50.36 | 658 | C <sub>42</sub> H <sub>58</sub> O <sub>6</sub>                                  | 1.42   | Fucosanthin                                                                                                                                              |
|              | 51.06 | 596 | C <sub>40</sub> H <sub>52</sub> O <sub>4</sub>                                  | 1.17   | Astaxanthin                                                                                                                                              |
|              | 52.14 | 490 | C <sub>33</sub> H <sub>38</sub> N <sub>4</sub>                                  | 1.51   | 13,17-Diethyl-2,8,12,18-tetramethyl-3,5-(2,2-dimethylpropano)porphyrin                                                                                   |
|              | 52.95 | 713 | C <sub>38</sub> H <sub>43</sub> N <sub>5</sub> O <sub>5</sub> Zn                | 1.29   | {[3 <i>Z</i> ]-2-[(Dimethylcarbamoyl)methyl]-3-ethylidene-13,17-bis[2'-(methoxycarbonyl)ethyl]-2,7,12,18-tetramethyl-2,3-dihydroporphytinato]} zinc (II) |
|              | 53.87 | 628 | C <sub>28</sub> H <sub>38</sub> Br <sub>2</sub> S <sub>3</sub>                  | 1.13   | 5,5''-Di bromo-3,3'',4,4''-tetra butyl-2,2':5',2''-terthiophene                                                                                          |

Table S1. Continued.

| Treatment | RT    | MW  | MF                                                                            | AREA% | Probabilities of the Detected Compounds                                                        |
|-----------|-------|-----|-------------------------------------------------------------------------------|-------|------------------------------------------------------------------------------------------------|
| nHAP_CE50 | 5.11  | 177 | C <sub>7</sub> H <sub>15</sub> NS <sub>2</sub>                                | 0.98  | 5,6-dihydro-2-ethyl-4,6-dimethyl-4 <i>H</i> -1,3,5-dithiazimethyl-4 <i>H</i> -1,3,5-dithiazine |
|           | 5.18  | 130 | C <sub>8</sub> H <sub>18</sub> O                                              | 1.62  | 2-Hexanol, 2,3-dimethyl-(CAS)                                                                  |
|           | 21.36 | 366 | C <sub>26</sub> H <sub>54</sub>                                               | 0.53  | Hexacosane (CAS)                                                                               |
|           | 23.79 | 156 | C <sub>11</sub> H <sub>24</sub>                                               | 0.73  | Undecane (CAS)                                                                                 |
|           | 24.24 | 246 | C <sub>14</sub> H <sub>18</sub> N <sub>2</sub> O <sub>2</sub>                 | 9.01  | 1-(4-Methoxyphenyl)-2-pentene-1,4-dione-4-dimethylhydrazone                                    |
|           | 26.09 | 212 | C <sub>15</sub> H <sub>32</sub>                                               | 0.85  | Pentadecane                                                                                    |
|           | 28.28 | 170 | C <sub>12</sub> H <sub>26</sub>                                               | 1.63  | Undecane, 2-methyl- (CAS)                                                                      |
|           | 30.36 | 226 | C <sub>16</sub> H <sub>34</sub>                                               | 1.22  | 2,6,10 - trimethyl - tridecane (WITHOUT stereochemistry)                                       |
|           | 31.19 | 610 | C <sub>26</sub> H <sub>16</sub> C <sub>14</sub> O <sub>5</sub> P <sub>2</sub> | 0.66  | 1,8-di (dichloro-phosphiny lidenoxy)-9,9-diphenyl-1-anthrone                                   |
|           | 32.35 | 296 | C <sub>21</sub> H <sub>44</sub>                                               | 1.79  | Heptadecane, 2,6,10,15-tetramethyl-(CAS)                                                       |
|           | 32.95 | 270 | C <sub>17</sub> H <sub>34</sub> O <sub>2</sub>                                | 12.07 | Hexadecanoic acid, methyl ester (CAS)                                                          |
|           | 34.24 | 296 | C <sub>21</sub> H <sub>44</sub>                                               | 1.57  | Heptadecane, 2,6,10,15-tetramethyl-(CAS)                                                       |
|           | 36.09 | 294 | C <sub>19</sub> H <sub>34</sub> O <sub>2</sub>                                | 35.77 | 9,12-Octadecadienoic acid, methyl ester                                                        |
|           | 36.18 | 296 | C <sub>19</sub> H <sub>36</sub> O <sub>2</sub>                                | 24.25 | 9-Octadecenoic acid, methyl ester                                                              |
|           | 36.63 | 298 | C <sub>19</sub> H <sub>38</sub> O <sub>2</sub>                                | 3.97  | Octadecanoic acid methyl ester (CAS)                                                           |
|           | 37.79 | 310 | C <sub>22</sub> H <sub>46</sub>                                               | 0.88  | Docosane (CAS)                                                                                 |
|           | 39.46 | 618 | C <sub>44</sub> H <sub>90</sub>                                               | 0.69  | Tetratetracontane (CAS)                                                                        |
|           | 45.51 | 128 | C <sub>9</sub> H <sub>20</sub>                                                | 0.54  | Hexane, 2,4,4-trimethyl-Ethyl5,6-Diphenyl                                                      |
|           | 48.23 | 579 | C <sub>37</sub> H <sub>30</sub> N <sub>3</sub> O <sub>2</sub> P               | 0.63  | -3-(triphenyl lphosphoranylideneamino) pyridazine-4-carboxylate                                |
|           | 54.18 | 83  | C <sub>4</sub> H <sub>5</sub> NO                                              | 0.61  | Isoxazole, 5-methyl-(CAS)                                                                      |

Table S1. Continued.

| Treatment   | RT    | MW   | MF                                                                             | AREA% | Probabilities of the Detected Compounds                                                                                                                    |
|-------------|-------|------|--------------------------------------------------------------------------------|-------|------------------------------------------------------------------------------------------------------------------------------------------------------------|
| nHAP_CE1000 | 5.14  | 130  | C <sub>7</sub> H <sub>14</sub> O <sub>2</sub>                                  | 6.11  | Pentanoic acid, 3-methyl-, methyl ester                                                                                                                    |
|             | 5.26  | 137  | C <sub>8</sub> H <sub>11</sub> NO                                              | 11.53 | 7-hydroxy-5,6,7,8-tetra hydroindolizine                                                                                                                    |
|             | 5.33  | 74   | C <sub>4</sub> H <sub>10</sub> O                                               | 6.89  | Ethane, 1,1'-oxybis-                                                                                                                                       |
|             | 5.40  | 612  | C <sub>40</sub> H <sub>44</sub> N <sub>4</sub> O <sub>2</sub>                  | 11.30 | 4,16-Di-t-butyl-10,11,22,23-tetramethyl-1,8,13,20-tetraazatetrabenzo[c,d,h: m:r]cyclooctadeca-hexadecaene-6,18-diol                                        |
|             | 5.56  | 606  | C <sub>38</sub> H <sub>46</sub> N <sub>4</sub> O <sub>3</sub>                  | 9.14  | Methyl 5-ethyl-5- dimethyl-delta-methyl Mesopyrophaeophorbide A and homologues                                                                             |
|             | 5.84  | 644  | C <sub>41</sub> H <sub>40</sub> O <sub>7</sub>                                 | 1.30  | 5''-(1,1-Dimethylethyl) -2 2',2'',2''',2''''-penta methoxy [1,1':3',1'':3'',1''':3''''.1''-quinquephenyl] -3,3''''-dicarboxyaldehyde                       |
|             | 17.64 | 628  | C <sub>28</sub> H <sub>38</sub> Br <sub>2</sub> S <sub>3</sub>                 | 1.49  | 5,5''-Dibromo-3,3'',4,4''-tetrabutyl-2,2':5',2''-terthiophene                                                                                              |
|             | 21.59 | 618  | C <sub>16</sub> H <sub>50</sub> BF <sub>3</sub> N <sub>6</sub> Si <sub>8</sub> | 1.28  | Fluorobis [3-fluorodimethylsilyl-2,2,4,4,6,6-hexa methyl-1,3,5-triaza-2,4,6-trisilacyclohexyl] borane                                                      |
|             | 23.16 | 1036 | C <sub>67</sub> H <sub>48</sub> N <sub>4</sub> O <sub>4</sub> Zn               | 1.45  | (R, S)-{5-[4(e)-(2-(1,4,5,8,9,10-Hexahydro-1,4,5,8-tetraoxo-9,10-(o-benzeno) anthracenyl) cyclohex-(e)-yl l] -10,15,20-tri-p-tolyl porphyrinato} zinc (II) |
|             | 24.23 | 828  | C <sub>42</sub> H <sub>70</sub> O <sub>5</sub> Yb                              | 34.65 | bis(2,6-di-t-butyl-4-methylphenolato) tris(tetrahydrofuran)ytterbium (II)                                                                                  |
|             | 24.38 | 609  | C <sub>37</sub> H <sub>47</sub> N <sub>5</sub> O <sub>3</sub>                  | 1.42  | 5-methoxy-15-nitro-2,3,7,8,12,13,17,18-octaethylporphyrin                                                                                                  |
|             | 24.83 | 748  | C <sub>52</sub> H <sub>60</sub> O <sub>4</sub>                                 | 1.45  | 26,28-Dihydroxy-25,27-dioxaocta-4-ene-2,6-diynyl-p-tert-butylcalix [4] arene                                                                               |
|             | 26.28 | 726  | C <sub>21</sub> H <sub>27</sub> Mo <sub>2</sub> O <sub>6</sub> P <sub>5</sub>  | 1.29  | Mo (CO) <sub>2</sub> [(C <sub>4</sub> H <sub>9</sub> -C-P) P <sub>2</sub> ] Mo (CO) <sub>4</sub> [(C <sub>4</sub> H <sub>9</sub> -C-P) <sub>2</sub> ]      |

|       |     |                       |      |                                                                                                                             |
|-------|-----|-----------------------|------|-----------------------------------------------------------------------------------------------------------------------------|
| 31.18 | 156 | $C_{10}H_{20}O$       | 1.26 | (2,4,6-Trimethylcyclohexyl) methanol                                                                                        |
| 32.34 | 170 | $C_{11}H_{22}O$       | 1.28 | Octyl Allyl Ether                                                                                                           |
| 36.63 | 632 | $C_{25}H_{16}Br_4$    | 1.28 | 4,4',4'',4'''-Tetrabromotetraphenylmethane                                                                                  |
| 41.16 | 370 | $C_{22}H_{42}O_4$     | 1.91 | Hexanedioic acid, dioctyl ester (CAS)                                                                                       |
| 44.08 | 621 | $C_{27}H_{34}BrCdN_5$ | 1.93 | Cadmium bromide hepta methylnitrite porphine complex                                                                        |
| 52.04 | 640 | $C_{16}H_4Br_4S_4$    | 1.39 | 2,7,12,17-tetrabrom-(all-às) cyclotetrathiophen (2,7,12,17-tetrabrom Cyclo octa[1,2-b:4,3-b':5,6-b'':8,7-b''']tetrathiophen |

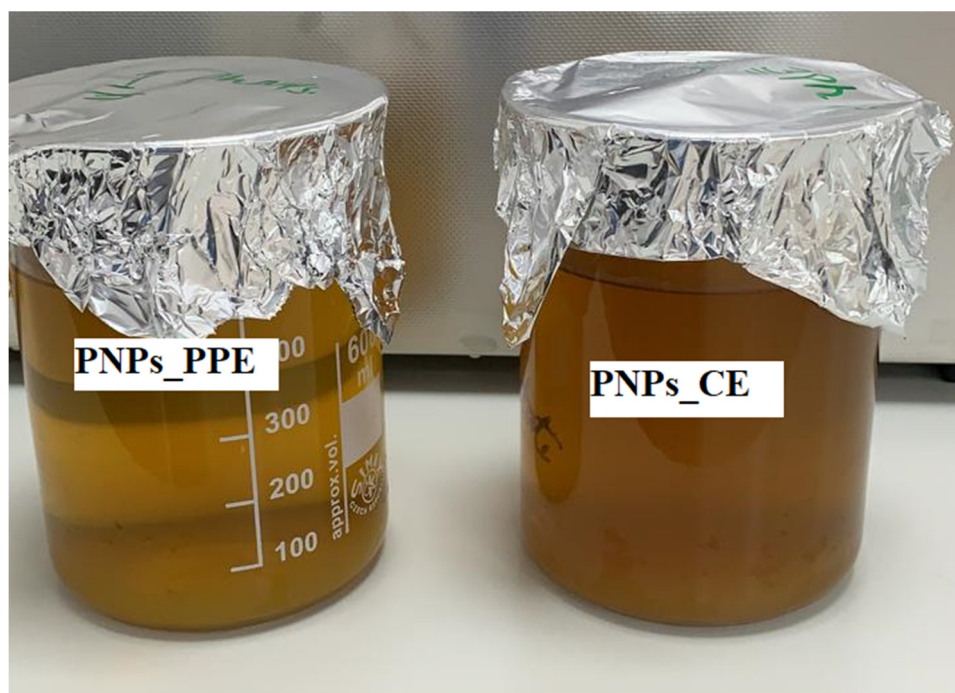

**Figure S1.** Preparation of phosphorous nanoparticles biologically using pomegranate peel extract (nHAPs\_PPE) and coffee ground extract (nHAPs\_CE).

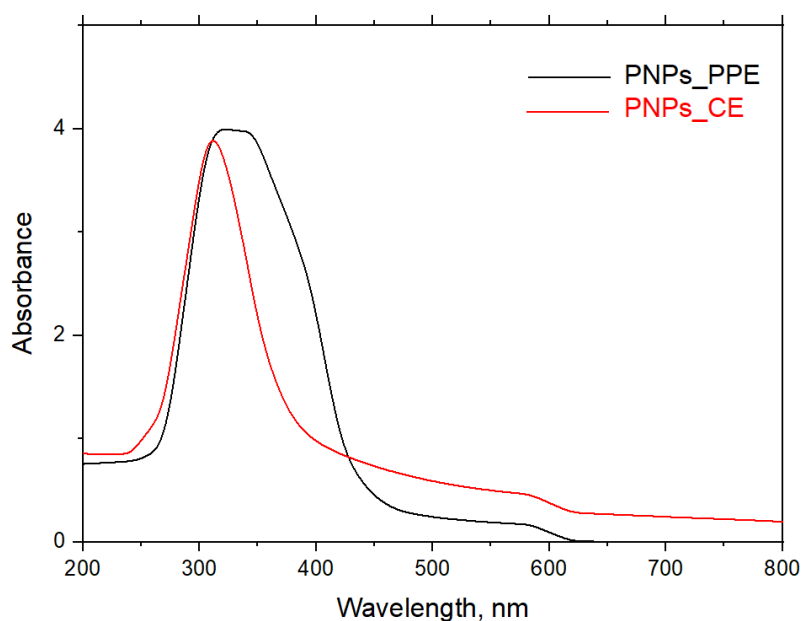

**Figure S2.** UV-Visible spectral analysis of green synthesized nHAPs\_PPE and nHAPs\_CE.
